# Supplementary material for: Genome-wide identification of the pectin methylesterase (PME) gene family in watermelon (Citrullus lanatus) and the role in the regulation of fruit softening
Source: Research Square preprint supplement (doi:10.21203/rs.3.rs-6366083/v1), 2025-06-18
Supplement: Supplementary file 1 [file 1aba4ffa29d2cb862e083fe9.xlsx]

## Sheet: Sheet1
ID	Theoretical pI/理论PL	Molecular weight/分子量	Number of amino acids/氨基酸数量	Total number of negatively charged residues/带负电荷残基数	Total number of positively charged residues/带正电荷残基数	Instability index/不稳定指数	Grand average of hydropathicity/亲水性指数总平均数
Cla97C06G114030	5.18	16337.4	151	18	15	52.26	-0.372
Cla97C11G206510	8.51	65737	594	74	79	37.37	-0.366
Cla97C09G163490	8.7	64306.8	588	62	69	25.93	-0.349
Cla97C11G211080	6.25	34540.8	312	34	31	35.86	-0.325
Cla97C06G125610	9.1	21149.4	186	18	24	53.01	-0.32
Cla97C06G114450	6.87	63104.9	570	65	64	32.07	-0.308
Cla97C05G089160	8.83	58456.2	524	49	57	30.31	-0.301
Cla97C09G167260	8.79	42742.4	383	37	43	30.52	-0.291
Cla97C03G067530	8.72	61239.6	541	53	59	42.16	-0.288
Cla97C05G087810	6.07	62668.5	568	68	64	29.47	-0.28
Cla97C03G067540	9.27	64767.6	586	59	77	28.74	-0.273
Cla97C07G141130	7.99	63481.9	576	57	59	39.66	-0.255
Cla97C09G171500	7.93	62491.7	568	59	61	27.91	-0.254
Cla97C01G007560	9.2	62238	566	51	65	33.14	-0.25
Cla97C01G021790	9.07	60915.6	555	51	62	32.86	-0.249
Cla97C01G007540	9.13	62254	568	53	66	32.41	-0.244
Cla97C01G004220	8.36	37738.4	339	32	35	31.4	-0.244
Cla97C07G141120	8.41	62189.2	567	57	61	30.27	-0.241
Cla97C06G110110	9.07	19632.5	177	15	21	47.52	-0.236
Cla97C02G026860	7.93	64258.6	589	52	54	41.41	-0.226
Cla97C02G048700	6.25	40154.4	368	41	39	33.4	-0.226
Cla97C01G004980	9.31	49623.3	449	37	51	25.42	-0.225
Cla97C02G048710	6.25	40224.6	368	41	39	32.88	-0.219
Cla97C09G182590	7.57	40611	366	38	39	25.75	-0.211
Cla97C03G065020	9	43015	391	40	47	33.62	-0.209
Cla97C06G114040	9.53	20262.5	187	17	27	31.53	-0.2
Cla97C05G103840	7.85	62552.7	568	49	51	33.47	-0.199
Cla97C09G168010	8.81	61023.6	557	45	52	30.38	-0.198
Cla97C01G007550	9.02	61854.6	567	52	63	30.6	-0.197
Cla97C11G220530	9.03	56171.6	507	38	49	38.44	-0.196
Cla97C05G082930	9.11	53022.4	481	51	59	33.15	-0.19
Cla97C01G006690	6.4	56703.9	515	51	47	33.84	-0.188
Cla97C09G179380	6.36	35827.6	318	33	30	37.86	-0.188
Cla97C05G091180	9.32	65952.9	604	45	60	41.06	-0.157
Cla97C05G083460	8.25	20698.7	186	24	26	43.31	-0.156
Cla97C03G057500	9.24	62302.2	567	48	63	30.13	-0.155
Cla97C02G040630	5.3	37650.5	340	33	27	36	-0.149
Cla97C05G089190	9.51	21412.7	195	15	26	38	-0.147
Cla97C05G082940	9.16	55048.5	509	41	54	33.78	-0.143
Cla97C07G135870	9.32	42269.6	378	31	44	24.79	-0.143
Cla97C06G110100	6.81	21352.7	190	22	22	38.03	-0.143
Cla97C05G088190	9.08	38523.7	349	28	35	35.4	-0.135
Cla97C01G006700	6.28	22953	210	22	21	39	-0.135
Cla97C10G190170	10.11	59434.6	533	33	70	38.85	-0.123
Cla97C02G026840	6.23	59392.1	542	47	43	38.49	-0.121
Cla97C01G000480	8.6	65615.3	604	51	56	41.37	-0.12
Cla97C10G184580	6.37	56196.9	508	48	47	32.26	-0.111
Cla97C07G137740	6.1	43397.7	393	30	25	28.4	-0.107
Cla97C03G065030	9.41	21557.6	199	18	26	38.55	-0.105
Cla97C06G110120	8.84	21431.9	188	22	27	48.92	-0.102
Cla97C02G040540	8.83	40650.9	363	29	37	39.74	-0.099
Cla97C09G175280	4.31	12476.2	116	18	9	38.95	-0.073
Cla97C09G168370	9.75	21440.6	197	17	27	37.34	-0.072
Cla97C08G158520	8.16	35527.2	323	29	31	44.52	-0.066
Cla97C08G161540	6.71	16490.9	151	16	16	66.09	-0.06
Cla97C03G054330	6.65	37607.6	337	29	28	30.84	-0.057
Cla97C09G168020	9.1	60827.2	555	41	53	26.31	-0.052
Cla97C03G066380	8.79	35792.7	326	26	31	29.9	-0.052
Cla97C01G003890	9.32	23727.1	218	19	25	43.62	-0.034
Cla97C10G194330	4.37	29333	279	32	13	70.5	-0.019
Cla97C10G194370	6.94	20986.1	188	16	16	41.24	-0.001
Cla97C09G171650	6.28	19540.3	182	19	18	30.04	0.014
Cla97C02G027500	6.18	60526.6	555	43	38	32.84	0.021
Cla97C03G054340	6.63	37437	328	28	26	34.47	0.022
Cla97C10G193990	4.4	16084.2	150	20	11	24.16	0.024
Cla97C10G187580	4.92	20787.8	192	24	17	38.13	0.027
Cla97C01G003880	9.85	22037.5	204	15	25	49.16	0.037
Cla97C05G089170	9.2	26821.9	245	16	22	40.07	0.127
Cla97C09G182130	5.43	37138.3	335	30	21	34.03	0.186
Cla97C06G114020	4.5	19908.7	187	14	9	18.09	0.202
Cla97C03G054300	5.5	12565.3	118	8	6	40.84	0.235
Cla97C05G107750	7.6	17413.1	163	13	14	38.01	0.256
Exegesis：The above table shows the analyzed data of physicochemical properties of the ClPME family, the first column is the gene ID of the Cucurbitaceae database; the second column is the theoretical PL value of each gene; the third column is the molecular weight of each gene; the fourth column is the number of amino acids included in each gene; the fifth and sixth columns are the number of negat…

## Sheet: Sheet2
Accession	GOids	GOterms	Score	Signal Peptide	Mitochondrion Transit Peptide	Chloroplast Transit Peptide	Transmembrane Alpha Helix	Transmembrane Beta Strand	GPI-anchor
Cla97C01G000480	GO:0031090	C:organelle membrane	0.69				41-68
Cla97C01G003880	GO:0005615	C:extracellular space	0.77	1-32
Cla97C01G003890	GO:0005886	C:plasma membrane	0.92				9-32
Cla97C01G004220	GO:0005615	C:extracellular space	0.98	45679
Cla97C01G004980	GO:0005634	C:nucleus	1
Cla97C01G006690	GO:0005634	C:nucleus	1
Cla97C01G006700	GO:0005615	C:extracellular space	1	45685
Cla97C01G007540	GO:0005886	C:plasma membrane	0.94				45741
Cla97C01G007550	GO:0005886	C:plasma membrane	0.89				45742
Cla97C01G007560	GO:0005886	C:plasma membrane	0.92				45742
Cla97C01G021790	GO:0005886	C:plasma membrane	0.92				13-39
Cla97C02G026840	GO:0012505	C:endomembrane system	0.91				45836
Cla97C02G026860	GO:0012505	C:endomembrane system	0.97				20-43
Cla97C02G027500	GO:0005615	C:extracellular space	0.99	45681
Cla97C02G040540	GO:0046658	C:anchored component of plasma membrane	1	45685			194-207		338-338
Cla97C02G040630	GO:0005615	C:extracellular space	0.99	45677
Cla97C02G048700	GO:0005615	C:extracellular space	1
Cla97C02G048710	GO:0005886	C:plasma membrane	0.91				45736
Cla97C03G054300	GO:0005615	C:extracellular space	1
Cla97C03G054330	GO:0005615	C:extracellular space	0.76	45679
Cla97C03G054340	GO:0005634	C:nucleus	1
Cla97C03G057500	GO:0012505	C:endomembrane system	0.86				23-51;97-111
Cla97C03G065020	GO:0009507	C:chloroplast	1
Cla97C03G065030	GO:0005615	C:extracellular space	1	45677
Cla97C03G066380	GO:0009507	C:chloroplast	1
Cla97C03G067530	GO:0005615	C:extracellular space	0.99	45680
Cla97C03G067540	GO:0005886	C:plasma membrane	0.89				9-34
Cla97C05G082930	GO:0005615	C:extracellular space	1	45676
Cla97C05G082940	GO:0005615	C:extracellular space	0.9	45680
Cla97C05G083460	GO:0005615	C:extracellular space	0.98	45684
Cla97C05G087810	GO:0005886	C:plasma membrane	0.93				45869
Cla97C05G088190	GO:0005634	C:nucleus	1
Cla97C05G089160	GO:0005615	C:extracellular space	0.99	45679
Cla97C05G089170	GO:0031090	C:organelle membrane	0.84				53-74
Cla97C05G089190	GO:0005886	C:plasma membrane	0.85				45740
Cla97C05G091180	GO:0005886	C:plasma membrane	0.8				36-64
Cla97C05G103840	GO:0005615	C:extracellular space	1	45679
Cla97C05G107750	GO:0005615	C:extracellular space	1	45682
Cla97C06G110100	GO:0005886	C:plasma membrane	0.95				5-32
Cla97C06G110110	GO:0009706	C:chloroplast inner membrane	0.61			45685	57-78
Cla97C06G110120	GO:0005886	C:plasma membrane	0.91				45739
Cla97C06G114020	GO:0005886	C:plasma membrane	0.98				9-31
Cla97C06G114030	GO:0009507	C:chloroplast	1
Cla97C06G114040	GO:0031090	C:organelle membrane	0.9				45830
Cla97C06G114450	GO:0005886	C:plasma membrane	0.85				13-37
Cla97C06G125610	GO:0005615	C:extracellular space	0.99	45681
Cla97C07G135870	GO:0005615	C:extracellular space	0.99	45679
Cla97C07G137740	GO:0012505	C:endomembrane system	0.96				45805
Cla97C07G141120	GO:0005886	C:plasma membrane	0.99				17-40
Cla97C07G141130	GO:0005886	C:plasma membrane	0.88				25-52
Cla97C08G158520	GO:0005615	C:extracellular space	0.96	45678
Cla97C08G161540	GO:0005615	C:extracellular space	0.62
Cla97C09G163490	GO:0012505	C:endomembrane system	0.84				30-54
Cla97C09G167260	GO:0005615	C:extracellular space	0.97	45683
Cla97C09G168010	GO:0005615	C:extracellular space	0.9	45682
Cla97C09G168020	GO:0012505	C:endomembrane system	0.73				14-33
Cla97C09G168370	GO:0005615	C:extracellular space	0.84	45684
Cla97C09G171500	GO:0005615	C:extracellular space	1	45681
Cla97C09G171650	GO:0046658	C:anchored component of plasma membrane	1	45687					160-160
Cla97C09G175280	GO:0005634	C:nucleus	1
Cla97C09G179380	GO:0009507	C:chloroplast	1
Cla97C09G182130	GO:0005615	C:extracellular space	0.99	45680
Cla97C09G182590	GO:0009507	C:chloroplast	1
Cla97C10G184580	GO:0005615	C:extracellular space	0.85	45682
Cla97C10G187580	GO:0005886	C:plasma membrane	0.99				45738
Cla97C10G190170	GO:0005615	C:extracellular space	0.98	45680
Cla97C10G193990	GO:0005634	C:nucleus	1
Cla97C10G194330	GO:0046658	C:anchored component of plasma membrane	1	45679					256-256
Cla97C10G194370	GO:0005634	C:nucleus	1
Cla97C11G206510	GO:0012505	C:endomembrane system	0.87				21-49
Cla97C11G211080	GO:0005634	C:nucleus	1
Cla97C11G220530	GO:0009507	C:chloroplast	1
